# Supplementary material
Source: PubMed Central journal article supplement (PMC1157040)

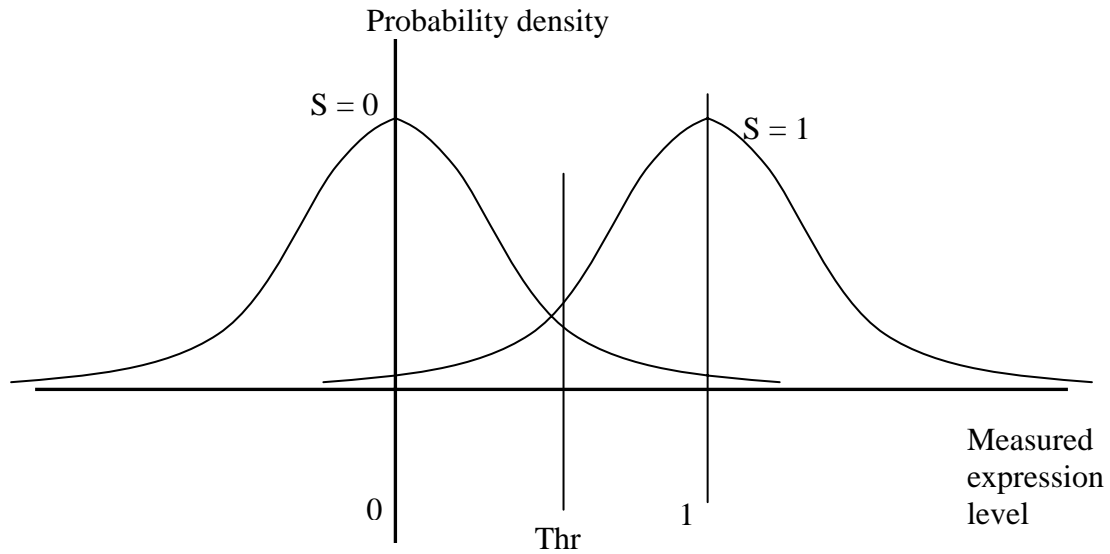

Supplement: pnas_0502674102_1.pdf [file pnas_0502674102_1.pdf]

**Num Genes**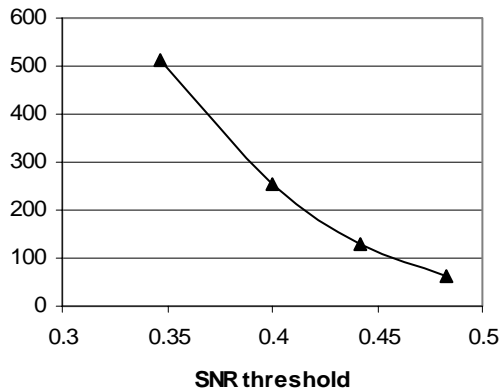**FDR, FNR**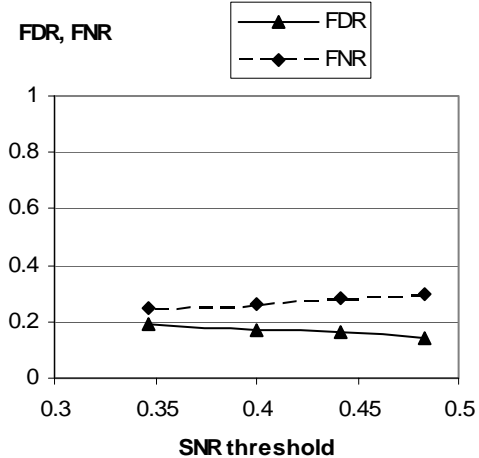**Num Genes**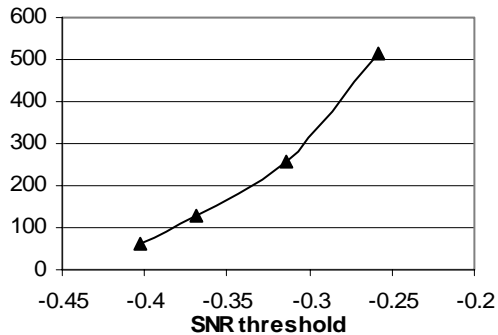**FDR, FNR**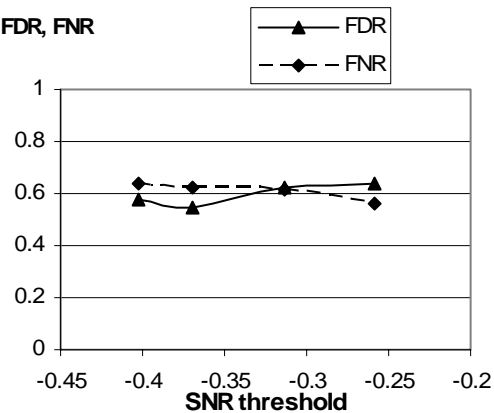

Supplement: pnas_0502674102_2.pdf [file pnas_0502674102_2.pdf]
